# Supplementary material
Source: publisher site journal article supplement (https://www.jstage.jst.go.jp/article/geochemj/48/2/48_2.0296/_supplement/_download/48_2.0296_1.pdf)
Supplement: Supplementary file 1 [file 48_2.0296_1.pdf]

Supplementary Table S1. Results of open-cell titration for CRM batch #99 using electrode No. 1\*

|    | Sample#1-1:101.75 g<br>titrant temp:28.9 °C<br>calculated density:<br>997.77 kg/m <sup>3</sup> |             |               | Sample#1-2:101.70 g<br>Titrant temp:28.7 °C<br>calculated density:<br>997.83 kg/m <sup>3</sup> |             |               | Sample#1-3:101.75 g<br>Titrant temp:28.6 °C<br>calculated density:<br>997.86 kg/m <sup>3</sup> |             |               |
|----|------------------------------------------------------------------------------------------------|-------------|---------------|------------------------------------------------------------------------------------------------|-------------|---------------|------------------------------------------------------------------------------------------------|-------------|---------------|
|    | HCl<br>(cm3)                                                                                   | EMF<br>(mV) | Temp.<br>(°C) | HCl<br>(cm3)                                                                                   | EMF<br>(mV) | Temp.<br>(°C) | HCl<br>(cm3)                                                                                   | EMF<br>(mV) | Temp.<br>(°C) |
| 0  | 0.000                                                                                          | -84.81      | 27.37         | 0.000                                                                                          | -85.37      | 27.39         | 0.000                                                                                          | -85.45      | 27.48         |
| 1  | 2.648                                                                                          | 167.86      | 27.30         | 2.648                                                                                          | 168.43      | 27.43         | 2.648                                                                                          | 168.09      | 27.48         |
| 2  | 2.688                                                                                          | 171.82      | 27.29         | 2.688                                                                                          | 172.17      | 27.43         | 2.688                                                                                          | 171.86      | 27.49         |
| 3  | 2.728                                                                                          | 175.05      | 27.29         | 2.728                                                                                          | 175.36      | 27.43         | 2.728                                                                                          | 175.06      | 27.49         |
| 4  | 2.768                                                                                          | 177.96      | 27.29         | 2.768                                                                                          | 178.26      | 27.44         | 2.768                                                                                          | 177.97      | 27.49         |
| 5  | 2.808                                                                                          | 180.57      | 27.28         | 2.808                                                                                          | 180.83      | 27.44         | 2.808                                                                                          | 180.58      | 27.49         |
| 6  | 2.848                                                                                          | 182.95      | 27.29         | 2.848                                                                                          | 183.19      | 27.44         | 2.848                                                                                          | 182.95      | 27.49         |
| 7  | 2.888                                                                                          | 185.10      | 27.29         | 2.888                                                                                          | 185.35      | 27.45         | 2.888                                                                                          | 185.12      | 27.48         |
| 8  | 2.928                                                                                          | 187.09      | 27.29         | 2.928                                                                                          | 187.34      | 27.45         | 2.928                                                                                          | 187.11      | 27.48         |
| 9  | 2.968                                                                                          | 188.96      | 27.28         | 2.968                                                                                          | 189.19      | 27.46         | 2.968                                                                                          | 188.98      | 27.48         |
| 10 | 3.008                                                                                          | 190.69      | 27.27         | 3.008                                                                                          | 190.91      | 27.46         | 3.008                                                                                          | 190.71      | 27.48         |
| 11 | 3.048                                                                                          | 192.31      | 27.28         | 3.048                                                                                          | 192.52      | 27.46         | 3.048                                                                                          | 192.33      | 27.48         |
| 12 | 3.088                                                                                          | 193.84      | 27.28         | 3.088                                                                                          | 194.05      | 27.46         | 3.088                                                                                          | 193.86      | 27.49         |
| 13 | 3.128                                                                                          | 195.29      | 27.27         | 3.128                                                                                          | 195.50      | 27.46         | 3.128                                                                                          | 195.31      | 27.49         |
| 14 | 3.168                                                                                          | 196.65      | 27.26         | 3.168                                                                                          | 196.86      | 27.47         | 3.168                                                                                          | 196.73      | 27.49         |
| 15 | 3.208                                                                                          | 197.96      | 27.26         | 3.208                                                                                          | 198.16      | 27.47         | 3.208                                                                                          | 197.99      | 27.48         |
| 16 | 3.248                                                                                          | 199.19      | 27.27         | 3.248                                                                                          | 199.40      | 27.47         | 3.248                                                                                          | 199.23      | 27.48         |
| 17 | 3.288                                                                                          | 200.38      | 27.26         | 3.288                                                                                          | 200.58      | 27.47         | 3.288                                                                                          | 200.41      | 27.48         |
| 18 | 3.328                                                                                          | 201.50      | 27.27         | 3.328                                                                                          | 201.70      | 27.48         | 3.328                                                                                          | 201.53      | 27.48         |
| 19 | 3.368                                                                                          | 202.58      | 27.27         | 3.368                                                                                          | 202.78      | 27.48         | 3.368                                                                                          | 202.61      | 27.48         |
| 20 | 3.408                                                                                          | 203.61      | 27.28         | 3.408                                                                                          | 203.82      | 27.48         | 3.408                                                                                          | 203.64      | 27.47         |
| 21 | 3.448                                                                                          | 204.62      | 27.28         | 3.448                                                                                          | 204.81      | 27.49         | 3.448                                                                                          | 204.64      | 27.46         |
| 22 | 3.488                                                                                          | 205.58      | 27.28         | 3.488                                                                                          | 205.76      | 27.49         | 3.488                                                                                          | 205.60      | 27.46         |
| 23 | 3.528                                                                                          | 206.50      | 27.28         | 3.528                                                                                          | 206.70      | 27.49         | 3.528                                                                                          | 206.54      | 27.46         |
| 24 | 3.568                                                                                          | 207.40      | 27.28         | 3.568                                                                                          | 207.59      | 27.50         | 3.568                                                                                          | 207.45      | 27.46         |

\* $k_s = 0.997$ ,  $E^\circ = 383.75$  mV, concentration of titrant = 0.1002 mol/L

Supplementary Table S2. Results of open-cell titration for CRM batch #99 using electrode No. 9\*

| Sample#9-1:102.2g<br>titrant temp:26.0 °C<br>calculated density:<br>998.59 kg/m <sup>3</sup> |             |               | Sample#9-2:102.33 g<br>Titrant temp:26.8 °C<br>calculated density:<br>998.37 kg/m <sup>3</sup> |             |               | Sample#9-3:72.18 g<br>Titrant temp:26.6 °C<br>calculated density:<br>998.42 kg/m <sup>3</sup> |             |               |       |
|----------------------------------------------------------------------------------------------|-------------|---------------|------------------------------------------------------------------------------------------------|-------------|---------------|-----------------------------------------------------------------------------------------------|-------------|---------------|-------|
| HCl<br>(cm <sup>3</sup> )                                                                    | EMF<br>(mV) | Temp.<br>(°C) | HCl<br>(cm <sup>3</sup> )                                                                      | EMF<br>(mV) | Temp.<br>(°C) | HCl<br>(cm <sup>3</sup> )                                                                     | EMF<br>(mV) | Temp.<br>(°C) |       |
| 0                                                                                            | 0.000       | -86.26        | 24.93                                                                                          | 0.000       | -86.29        | 24.90                                                                                         | 0.000       | -85.57        | 26.26 |
| 1                                                                                            | 2.698       | 172.05        | 25.12                                                                                          | 2.698       | 171.71        | 24.99                                                                                         | 1.999       | 182.79        | 26.17 |
| 2                                                                                            | 2.738       | 175.32        | 25.12                                                                                          | 2.738       | 174.94        | 25.00                                                                                         | 2.029       | 185.36        | 26.17 |
| 3                                                                                            | 2.778       | 178.11        | 25.13                                                                                          | 2.778       | 177.81        | 25.01                                                                                         | 2.059       | 187.58        | 26.18 |
| 4                                                                                            | 2.818       | 180.69        | 25.13                                                                                          | 2.818       | 180.37        | 25.01                                                                                         | 2.089       | 189.59        | 26.18 |
| 5                                                                                            | 2.858       | 182.98        | 25.14                                                                                          | 2.858       | 182.78        | 25.01                                                                                         | 2.119       | 191.49        | 26.18 |
| 6                                                                                            | 2.898       | 185.09        | 25.15                                                                                          | 2.898       | 184.87        | 25.02                                                                                         | 2.148       | 193.22        | 26.18 |
| 7                                                                                            | 2.938       | 187.03        | 25.15                                                                                          | 2.938       | 186.82        | 25.02                                                                                         | 2.178       | 194.87        | 26.19 |
| 8                                                                                            | 2.978       | 188.88        | 25.16                                                                                          | 2.978       | 188.67        | 25.03                                                                                         | 2.208       | 196.41        | 26.20 |
| 9                                                                                            | 3.018       | 190.58        | 25.16                                                                                          | 3.018       | 190.36        | 25.03                                                                                         | 2.238       | 197.82        | 26.20 |
| 10                                                                                           | 3.058       | 192.19        | 25.16                                                                                          | 3.058       | 191.96        | 25.03                                                                                         | 2.268       | 199.22        | 26.21 |
| 11                                                                                           | 3.098       | 193.67        | 25.17                                                                                          | 3.098       | 193.49        | 25.04                                                                                         | 2.298       | 200.50        | 26.21 |
| 12                                                                                           | 3.138       | 195.08        | 25.17                                                                                          | 3.138       | 194.92        | 25.04                                                                                         | 2.328       | 201.73        | 26.21 |
| 13                                                                                           | 3.178       | 196.43        | 25.18                                                                                          | 3.178       | 196.26        | 25.05                                                                                         | 2.358       | 202.92        | 26.21 |
| 14                                                                                           | 3.218       | 197.76        | 25.18                                                                                          | 3.218       | 197.55        | 25.05                                                                                         | 2.388       | 204.05        | 26.22 |
| 15                                                                                           | 3.258       | 198.98        | 25.19                                                                                          | 3.258       | 198.77        | 25.05                                                                                         | 2.418       | 205.15        | 26.21 |
| 16                                                                                           | 3.298       | 200.10        | 25.20                                                                                          | 3.298       | 199.94        | 25.06                                                                                         | 2.448       | 206.18        | 26.21 |
| 17                                                                                           | 3.338       | 201.24        | 25.20                                                                                          | 3.338       | 201.05        | 25.06                                                                                         | 2.478       | 207.16        | 26.21 |
| 18                                                                                           | 3.378       | 202.29        | 25.21                                                                                          | 3.378       | 202.1         | 25.07                                                                                         | 2.508       | 208.14        | 26.22 |
| 19                                                                                           | 3.418       | 203.33        | 25.21                                                                                          | 3.418       | 203.14        | 25.08                                                                                         | 2.538       | 209.06        | 26.21 |
| 20                                                                                           | 3.458       | 204.30        | 25.21                                                                                          | 3.458       | 204.16        | 25.08                                                                                         | 2.568       | 210.08        | 26.22 |
| 21                                                                                           | 3.498       | 205.25        | 25.21                                                                                          | 3.498       | 205.11        | 25.08                                                                                         | 2.598       | 210.19        | 26.22 |
| 22                                                                                           | 3.538       | 206.16        | 25.22                                                                                          | 3.538       | 206.01        | 25.09                                                                                         | 2.628       | 211.31        | 26.23 |
| 23                                                                                           | 3.577       | 207.04        | 25.23                                                                                          | 3.577       | 206.91        | 25.09                                                                                         | 2.658       | 212.68        | 26.24 |
| 24                                                                                           | 3.617       | 207.90        | 25.23                                                                                          | 3.617       | 207.75        | 25.10                                                                                         | 2.688       | 214.00        | 26.24 |

\* $k_s = 0.989$ ,  $E^\circ = 377.27$  mV, concentration of titrant = 0.1002 mol/L

Supplementary Table S3. Results of open-cell titration for CRM batch #99 using electrode No. 1\* without air bubbling.

| Sample#1-4:102.87g<br>titrant temp:26.4 °C<br>calculated density:<br>998.48 kg/m <sup>3</sup> |             |               | Sample#1-5:100.38 g<br>Titrant temp:26.8 °C<br>calculated density:<br>998.37 kg/m <sup>3</sup> |             |               |       |
|-----------------------------------------------------------------------------------------------|-------------|---------------|------------------------------------------------------------------------------------------------|-------------|---------------|-------|
| HCl<br>(cm <sup>3</sup> )                                                                     | EMF<br>(mV) | Temp.<br>(°C) | HCl<br>(cm <sup>3</sup> )                                                                      | EMF<br>(mV) | Temp.<br>(°C) |       |
| 0                                                                                             | 0.000       | -86.00        | 24.34                                                                                          | 0.000       | -86.02        | 24.76 |
| 1                                                                                             | 2.698       | 171.41        | 24.82                                                                                          | 2.548       | 162.95        | 24.95 |
| 2                                                                                             | 2.738       | 174.59        | 24.82                                                                                          | 2.588       | 167.27        | 24.95 |
| 3                                                                                             | 2.778       | 177.45        | 24.83                                                                                          | 2.628       | 171.01        | 24.95 |
| 4                                                                                             | 2.818       | 180.00        | 24.84                                                                                          | 2.668       | 174.30        | 24.96 |
| 5                                                                                             | 2.858       | 182.34        | 24.85                                                                                          | 2.708       | 177.23        | 24.97 |
| 6                                                                                             | 2.898       | 184.47        | 24.86                                                                                          | 2.748       | 179.85        | 24.97 |
| 7                                                                                             | 2.938       | 186.48        | 24.87                                                                                          | 2.788       | 182.24        | 24.98 |
| 8                                                                                             | 2.978       | 188.32        | 24.88                                                                                          | 2.828       | 184.46        | 24.98 |
| 9                                                                                             | 3.018       | 190.05        | 24.89                                                                                          | 2.868       | 186.48        | 24.99 |
| 10                                                                                            | 3.058       | 191.66        | 24.90                                                                                          | 2.908       | 188.35        | 24.99 |
| 11                                                                                            | 3.098       | 193.18        | 24.91                                                                                          | 2.948       | 190.09        | 24.99 |
| 12                                                                                            | 3.138       | 194.62        | 24.92                                                                                          | 2.988       | 191.74        | 24.99 |
| 13                                                                                            | 3.178       | 195.97        | 24.93                                                                                          | 3.028       | 193.26        | 24.98 |
| 14                                                                                            | 3.218       | 197.29        | 24.95                                                                                          | 3.068       | 194.76        | 25.00 |
| 15                                                                                            | 3.258       | 198.53        | 24.96                                                                                          | 3.108       | 196.14        | 25.00 |
| 16                                                                                            | 3.298       | 199.70        | 24.97                                                                                          | 3.148       | 197.45        | 25.00 |
| 17                                                                                            | 3.338       | 200.82        | 24.98                                                                                          | 3.188       | 198.69        | 25.01 |
| 18                                                                                            | 3.378       | 201.89        | 24.99                                                                                          | 3.228       | 199.90        | 25.01 |
| 19                                                                                            | 3.418       | 202.92        | 25.00                                                                                          | 3.268       | 201.02        | 25.02 |
| 20                                                                                            | 3.458       | 203.92        | 25.01                                                                                          | 3.308       | 202.13        | 25.03 |
| 21                                                                                            | 3.498       | 204.99        | 25.02                                                                                          | 3.348       | 203.15        | 25.03 |
| 22                                                                                            | 3.538       | 205.80        | 25.03                                                                                          | 3.388       | 204.15        | 25.03 |
| 23                                                                                            | 3.577       | 206.68        | 25.04                                                                                          | 3.428       | 205.15        | 25.04 |
| 24                                                                                            | 3.617       | 207.60        | 25.04                                                                                          | 3.468       | 206.06        | 25.04 |

\* $k_s = 0.997$ ,  $E^\circ = 383.75$  mV, concentration of titrant = 0.1002 mol/L
